# Supplementary material for: Evidence for iceberg fertilization of the NW Atlantic
Source: Copernicus journal article supplement (doi:10.5194/os-2021-61), 2021-08-09
Supplement: Supplementary file [file os-2021-61-AC1-supplement.pdf]

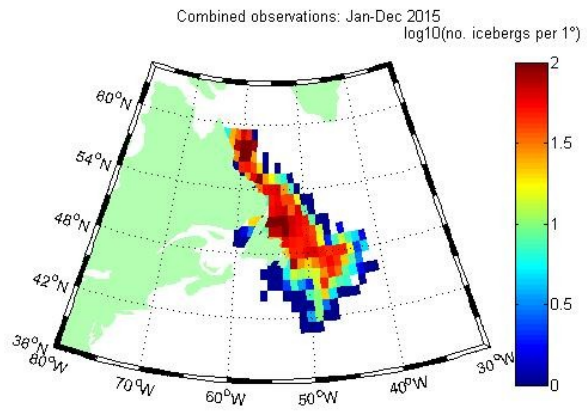

Figure 1: iceberg density map for icebergs seen in our region during the year 2015.
